# Supplementary material for: Drug-induced optic neuropathy in a case of extensively drug-resistant pulmonary tuberculosis
Source: publisher site journal article supplement (doi:10.1515/jbcpp-2018-0007), 2018-09-03
Supplement: Supplementary file 1 [file 2016-09468-Internal_printout.pdf › 2016-09468-Internal_printout.pdf]

## Report information

|                                   |                                               |                                  |                            |                             |
|-----------------------------------|-----------------------------------------------|----------------------------------|----------------------------|-----------------------------|
| <b>Report header</b>              | Visual impairment: Linezolid                  |                                  |                            |                             |
| <b>Type of report</b>             | <b>Date first received at regional centre</b> | <b>Version</b>                   |                            |                             |
| spontaneous                       | 2016-02-27                                    | 1                                |                            |                             |
| <b>Literature reference</b>       |                                               |                                  |                            |                             |
| <b>Type of sender</b>             | <b>Sender</b>                                 | <b>Contact person</b>            | <b>Sender's report no.</b> | <b>Worldwide unique no.</b> |
| regional pharmacovigilance center | MAMC, New Delhi                               | Shalini Chawla                   | MAMC/FEB-2016/042          | IN-IPC-2016-09468           |
| <b>Reporter qualification</b>     | <b>Country of occurrence</b>                  | <b>Country of primary source</b> |                            |                             |
| physician                         | India                                         | India                            |                            |                             |
| <b>Serious case?</b>              | no                                            |                                  |                            |                             |

## Patient characteristics

| Initials                         | Sex            | Date of birth | Age at onset | Age group | Weight (kg) | Height (cm) | Death date |
|----------------------------------|----------------|---------------|--------------|-----------|-------------|-------------|------------|
| YK                               | male           |               | 26 year(s)   | adult     | 53          |             |            |
| <b>Death cause</b>               |                |               |              |           |             |             |            |
| <b>Death cause after autopsy</b> |                |               |              |           |             |             |            |
| <b>Comment on death</b>          | Not applicable |               |              |           |             |             |            |

## Relevant Medical History

|                                             | Start date                                                                   | Stop date | Continuing |
|---------------------------------------------|------------------------------------------------------------------------------|-----------|------------|
| <b>Relevant medical history - free text</b> | No family history of tuberculosis, no smoking habit. MDR-TB failure in 2014. |           |            |

## Reaction(s)/Event(s) (WHO-ART)

|                   | Onset date | End date | Duration | Treatment | Outcome                    |
|-------------------|------------|----------|----------|-----------|----------------------------|
| Visual impairment | 2016-01-24 |          |          | 3         | not recovered/not resolved |
| Neuropathy        | 2016-01-24 |          |          | 3         | not recovered/not resolved |

**Treatment:** 1=no treatment, 2=non-medical treat., 3=medical treatment, 4=dialysis, 5=surgery, 6=unknown

## Causality of Drug to Reaction (CIOMS V)

|                  | Visual impairment | Neuropathy      | ADRs labelled | Interact |
|------------------|-------------------|-----------------|---------------|----------|
| <b>Linezolid</b> | Probable/Likely   | Probable/Likely | yes           |          |
| <b>Isoniazid</b> | Possible          | Probable/Likely | yes           |          |

### Suspected Drugs: Details

|                                      | GF<br>Batchno                                                                                                                 | Strength | Route | Dose   | Dosage<br>regimen | StartDate<br>EndDate     | Duration<br>of use | Action<br>taken | Re-<br>chall | Susp<br>ingred | Indication<br>(ICD-10)                                                                              |
|--------------------------------------|-------------------------------------------------------------------------------------------------------------------------------|----------|-------|--------|-------------------|--------------------------|--------------------|-----------------|--------------|----------------|-----------------------------------------------------------------------------------------------------|
| <b>Linezolid</b><br><i>Linezolid</i> | Unspec<br>Not<br>available                                                                                                    | Unspec   | oral  | 600 mg | 1 per 1<br>day(s) | 2014-09-22<br>2016-02-27 | 524 day(s)         | 1               |              | AI             | Respiratory<br>tuberculosis<br>unspecified,<br>confirmed<br>bacteriologically<br>and histologically |
| <b>Additional<br/>information</b>    | Indication: Extensively drug resistance tuberculosis.<br>High dose Isoniazid and Linezolid were replaced with Clarithromycin. |          |       |        |                   |                          |                    |                 |              |                |                                                                                                     |
| <b>Isoniazid</b><br><i>Isoniazid</i> | Unspec<br>Not<br>available                                                                                                    | Unspec   | oral  | 900 mg | 1 per 1<br>day(s) | 2014-09-22<br>2016-02-27 | 524 day(s)         | 1               |              | AI             | Respiratory<br>tuberculosis<br>unspecified,<br>confirmed<br>bacteriologically<br>and histologically |
| <b>Additional<br/>information</b>    | Indication: Extensively drug resistance tuberculosis.<br>High dose Isoniazid and Linezolid were replaced with Clarithromycin. |          |       |        |                   |                          |                    |                 |              |                |                                                                                                     |

**Suspected Ingredient:** AI=Active Ingredient, PR=Preservative, AX=Antioxidant, ST=Stabilizer, CL=Color, FA=Flavouring agent,  
SO=Solvent, CO=Constituent, EP=Excess percent

**Action taken:** 1=drug withdrawn, 2=dose reduced, 3=dose increased, 4=dose not changed, 5=unknown, 6=not applicable

**Rechallenge Info:** A=reaction recurred, B=no recurrence, C=effect unknown

### Concomitant Drugs

|                                                                                  | GF<br>Batchno                                                  | Strength | Route | Dose   | Dosage<br>regimen | StartDate<br>EndDate | Duration<br>of use | Indication<br>(ICD-10)                                                                              |
|----------------------------------------------------------------------------------|----------------------------------------------------------------|----------|-------|--------|-------------------|----------------------|--------------------|-----------------------------------------------------------------------------------------------------|
| <b>Moxifloxacin</b><br><i>Moxifloxacin<br/>hydrochloride</i>                     | Unspec<br>Not<br>available                                     | Unspec   | oral  | 400 mg | 1 per 1<br>day(s) | 2014-09-22<br>-      |                    | Respiratory<br>tuberculosis<br>unspecified,<br>confirmed<br>bacteriologically<br>and histologically |
| <b>Additional<br/>information</b>                                                | Indication: Extensively drug resistance tuberculosis (XDR-TB). |          |       |        |                   |                      |                    |                                                                                                     |
| <b>Clofazimine</b><br><i>Clofazimine</i>                                         | Unspec<br>Not<br>available                                     | Unspec   | oral  | 200 mg | 1 per 1<br>day(s) | 2014-09-22<br>-      |                    | Respiratory<br>tuberculosis<br>unspecified,<br>confirmed<br>bacteriologically<br>and histologically |
| <b>Additional<br/>information</b>                                                | Indication: Extensively drug resistance tuberculosis (XDR-TB). |          |       |        |                   |                      |                    |                                                                                                     |
| <b>Pas</b><br><i>Aminosalicylate<br/>sodium</i>                                  | Unspec<br>Not<br>available                                     | Unspec   | oral  | 12 g   | 1 per 1<br>day(s) | 2014-09-22<br>-      |                    | Respiratory<br>tuberculosis<br>unspecified,<br>confirmed<br>bacteriologically<br>and histologically |
| <b>Additional<br/>information</b>                                                | Indication: Extensively drug resistance tuberculosis (XDR-TB). |          |       |        |                   |                      |                    |                                                                                                     |
| <b>Amoxyclav</b><br><i>Amoxicillin<br/>sodium/<br/>Clavulanate<br/>potassium</i> | Unspec<br>Not<br>available                                     | Unspec   | oral  | 1 g    | 2 per 1<br>day(s) | 2014-09-22<br>-      |                    | Respiratory<br>tuberculosis<br>unspecified,<br>confirmed<br>bacteriologically<br>and histologically |
| <b>Additional<br/>information</b>                                                | Indication: Extensively drug resistance tuberculosis (XDR-TB). |          |       |        |                   |                      |                    |                                                                                                     |

print date: 2016-02-29

Internal printout - page 3 of 3

|                                                  |                                                                |        |               |     |                |                 |                                                                                      |
|--------------------------------------------------|----------------------------------------------------------------|--------|---------------|-----|----------------|-----------------|--------------------------------------------------------------------------------------|
| <b>Capreomycin</b><br><i>Capreomycin sulfate</i> | Unspec<br>Not available                                        | Unspec | intramuscular | 1 g | 1 per 1 day(s) | 2014-09-22<br>- | Respiratory tuberculosis unspecified, confirmed bacteriologically and histologically |
| <b>Additional information</b>                    | Indication: Extensively drug resistance tuberculosis (XDR-TB). |        |               |     |                |                 |                                                                                      |

## Description and Assessment

### Reporter's comment

C/O Diminished vision (color blindness) and numbness in the lower limb.

### Case narrative

A 26-year-old male patient weighed 53 kg who developed visual impairment and neuropathy while receiving linezolid and isoniazid.

The relevant medical history included, MDR-TB failure in 2014. The patient started receiving linezolid 600 mg once daily since 22 September 2014 and stopped on 27 February 2016 for XDR-TB, isoniazid 900 mg once daily since 22 September 2014 and stopped on 27 February 2016 for XDR-TB. The concomitant medicines included, moxifloxacin 400 mg once daily since 22 September 2014 for XDR-TB, clofazimine 200 mg once daily since 22 September 2014 for XDR-TB, PAS 12 g once daily since 22 September 2014 for XDR-TB, amoxycylave 1 g twice daily since 22 September 2014 for XDR-TB, capreomycin 1 g once daily since 22 September 2014 for XDR-TB. The patient experienced adverse events of diminished vision and numbness in the lower limb started on 24 January 2016.

The clinical outcome of adverse events were Not recovered.

Causality assessed as Probable for Linezolid and Possible for Isoniazid.

### Sender's comment

Reasonable possibility of a relationship between the suspected medicines and the adverse events.

### References

Not available

## Appendix - Tests and procedures

### Results of tests and procedures - free text

25/2/2016 -Blurring of disc margins. -S/O B/E disc edema. -Fundus response B/E Vision Rt-3/60, Lf-2/60

| Test type | range | more information |
|-----------|-------|------------------|
|-----------|-------|------------------|
